# Supplementary material for: On the potential of porphyrin-spiked triarylamine stars for bulk heterojunction solar cells
Source: Royal Society of Chemistry journal article supplement (doi:10.1039/c3ta11095h), 2013-01-01
Supplement: c3ta11095h.pdf [file c3ta11095h.pdf]

Supporting Information for:

**On the Potential of Porphyrin-spiked Triarylamine Stars for Bulk Heterojunction  
Solar Cells**

Thanisa Kengthanomma, Patchanita Thamyongkit\*, Jacek Gasiorowski, Alberto  
Montaigne Ramil and Niyazi Serdar Sariciftci

**Table of Contents**

|                                                        |         |
|--------------------------------------------------------|---------|
| Characterization data of <b>1</b>                      | S2–S4   |
| Characterization data of <b>2</b>                      | S5–S7   |
| Characterization data of <b>4</b>                      | S8–S10  |
| MALDI-TOF-MS spectrum of a mixture containing <b>5</b> | S11     |
| Characterization data of <b>Zn-4</b>                   | S12–S14 |
| Absorption spectrum of a P3HT film                     | S15     |

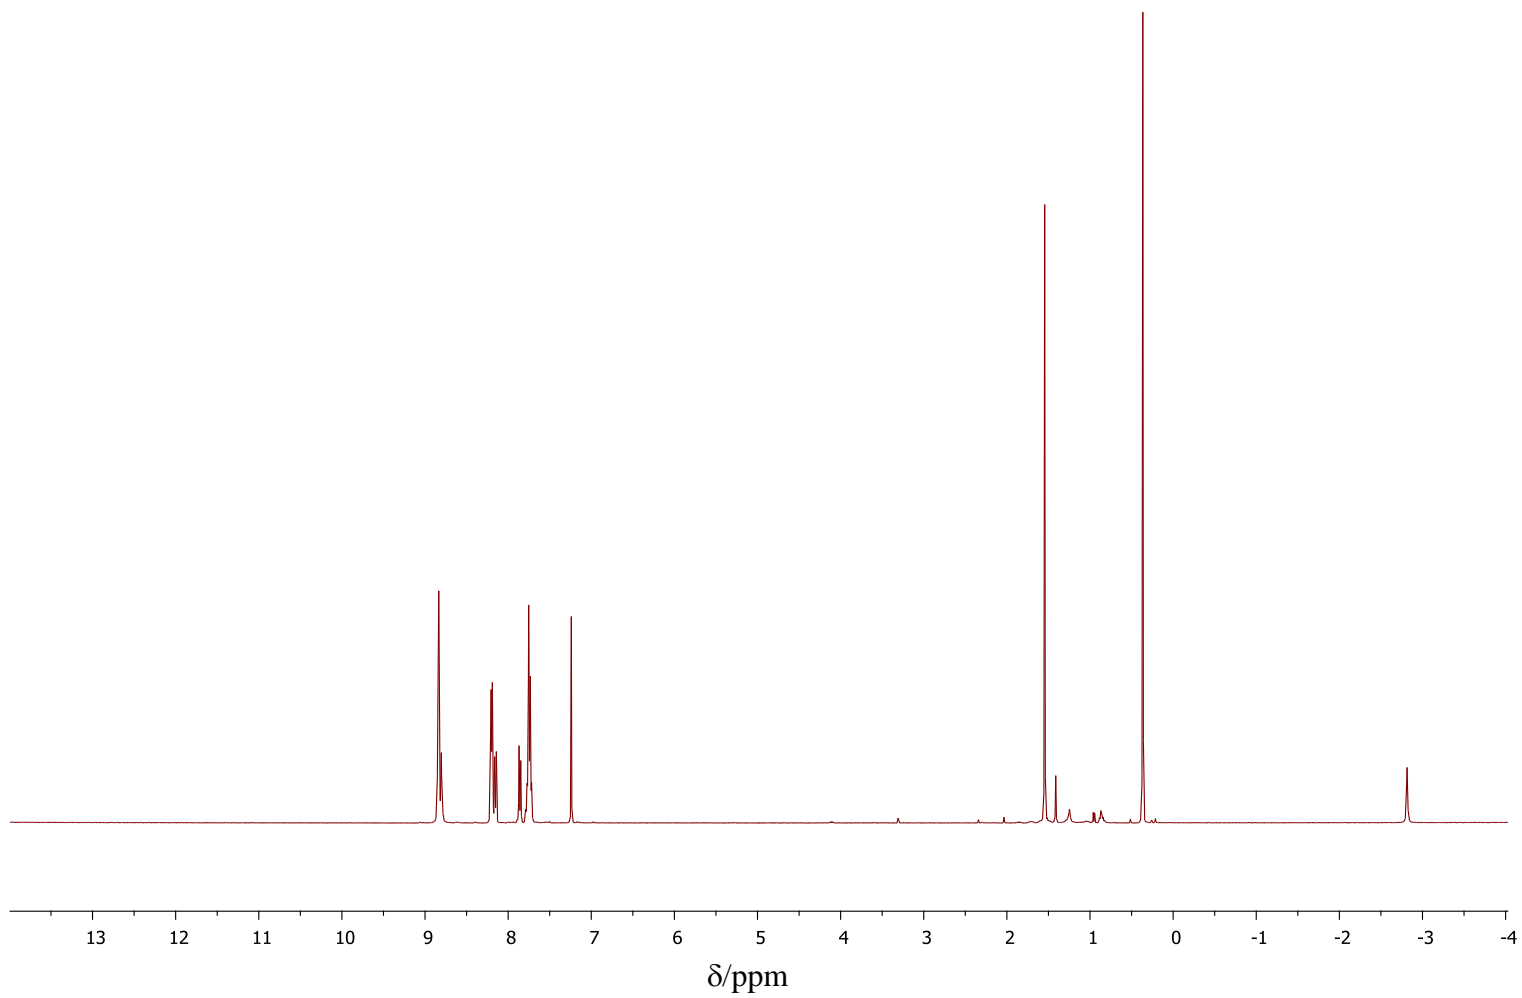

$^1\text{H-NMR}$  spectrum of **1** in  $\text{CDCl}_3$

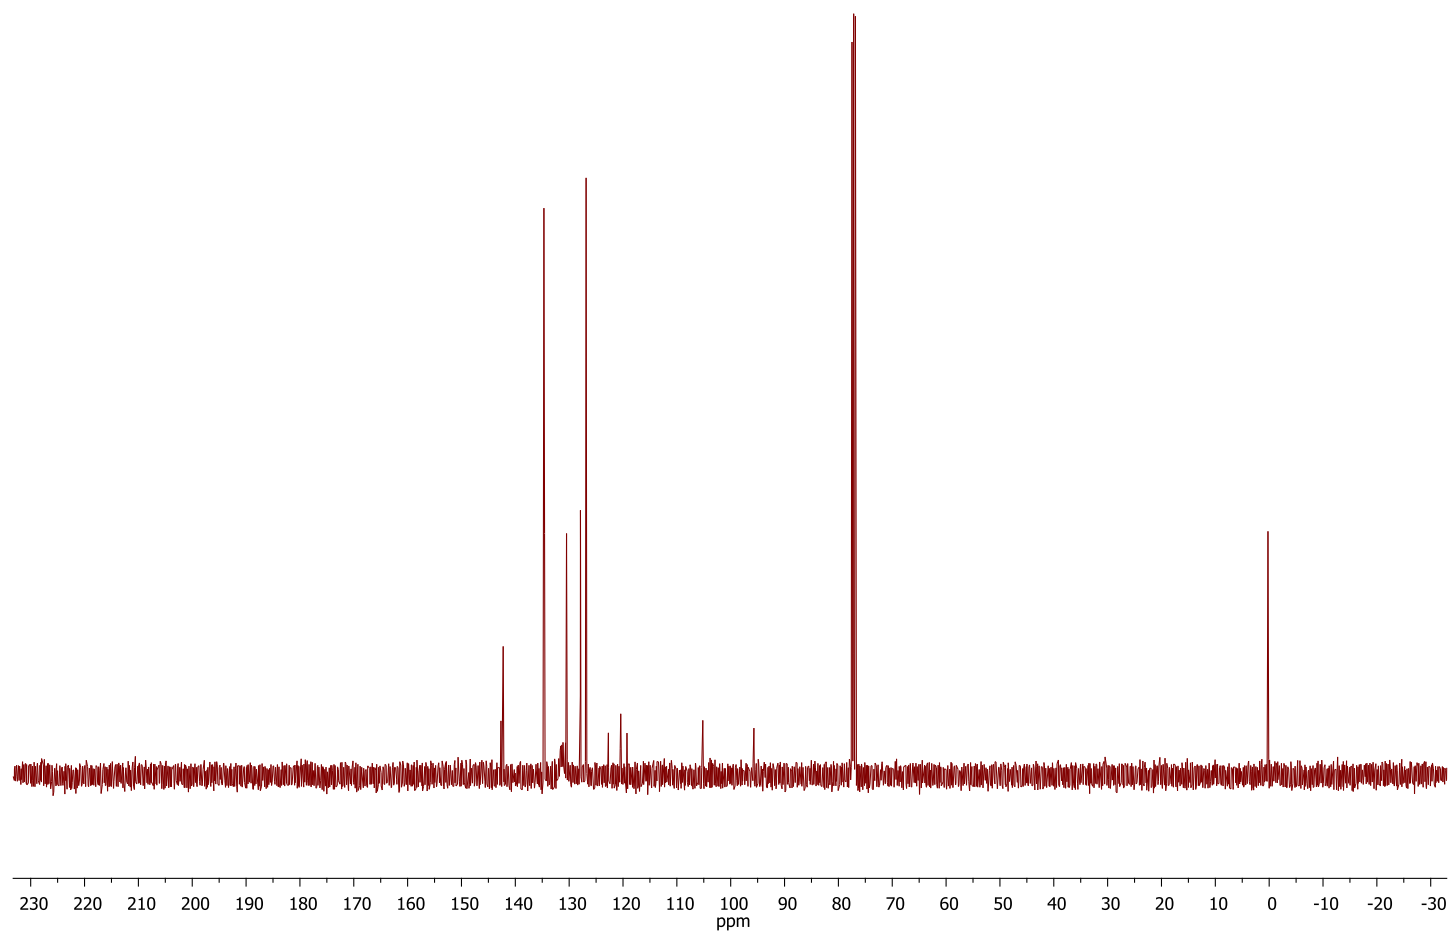

$^{13}\text{C}$ -NMR spectrum of **1** in  $\text{CDCl}_3$

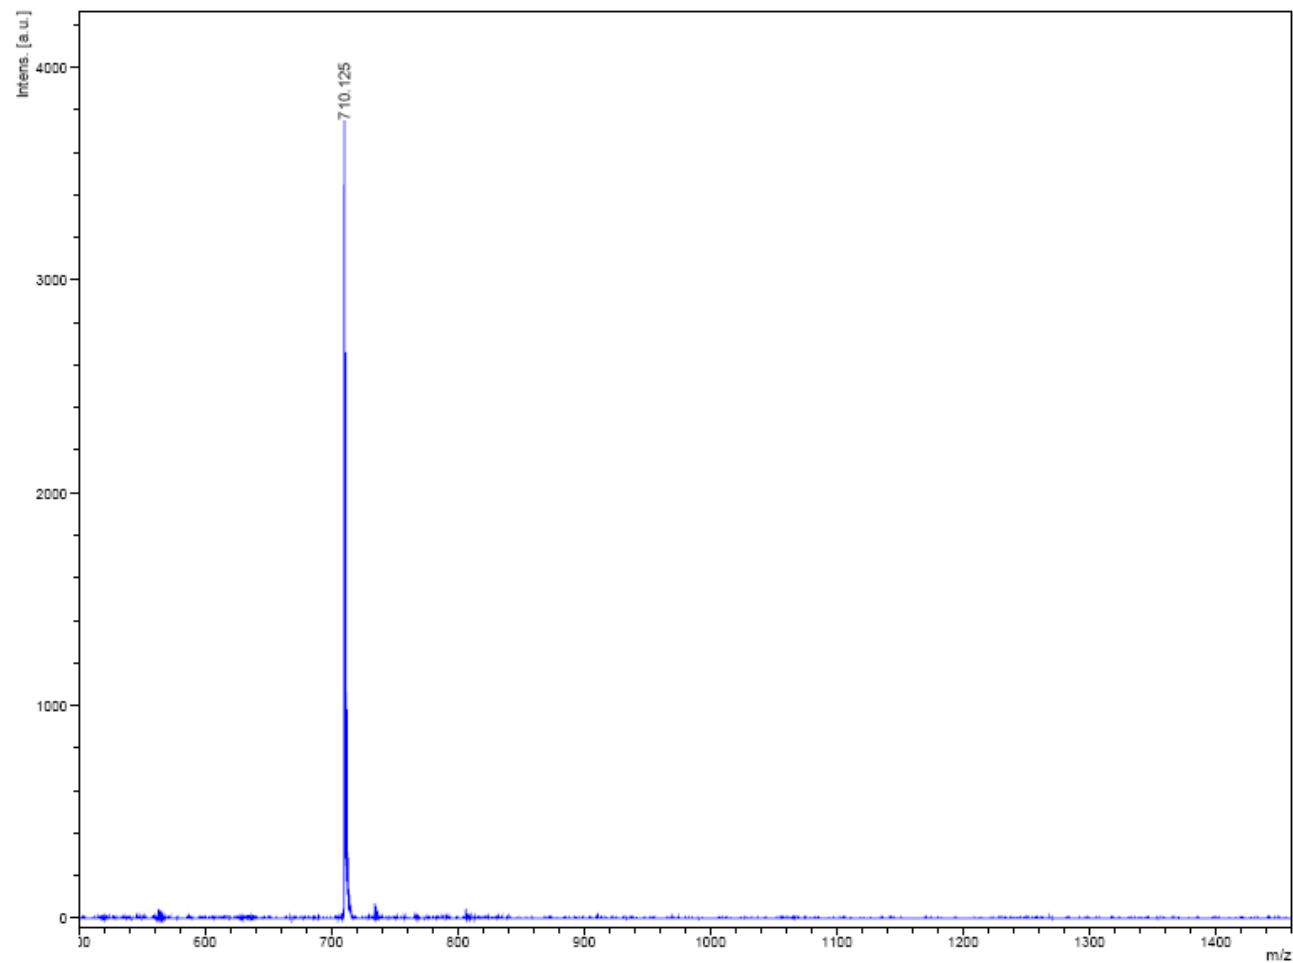

MALDI-TOF-MS spectrum of **1**

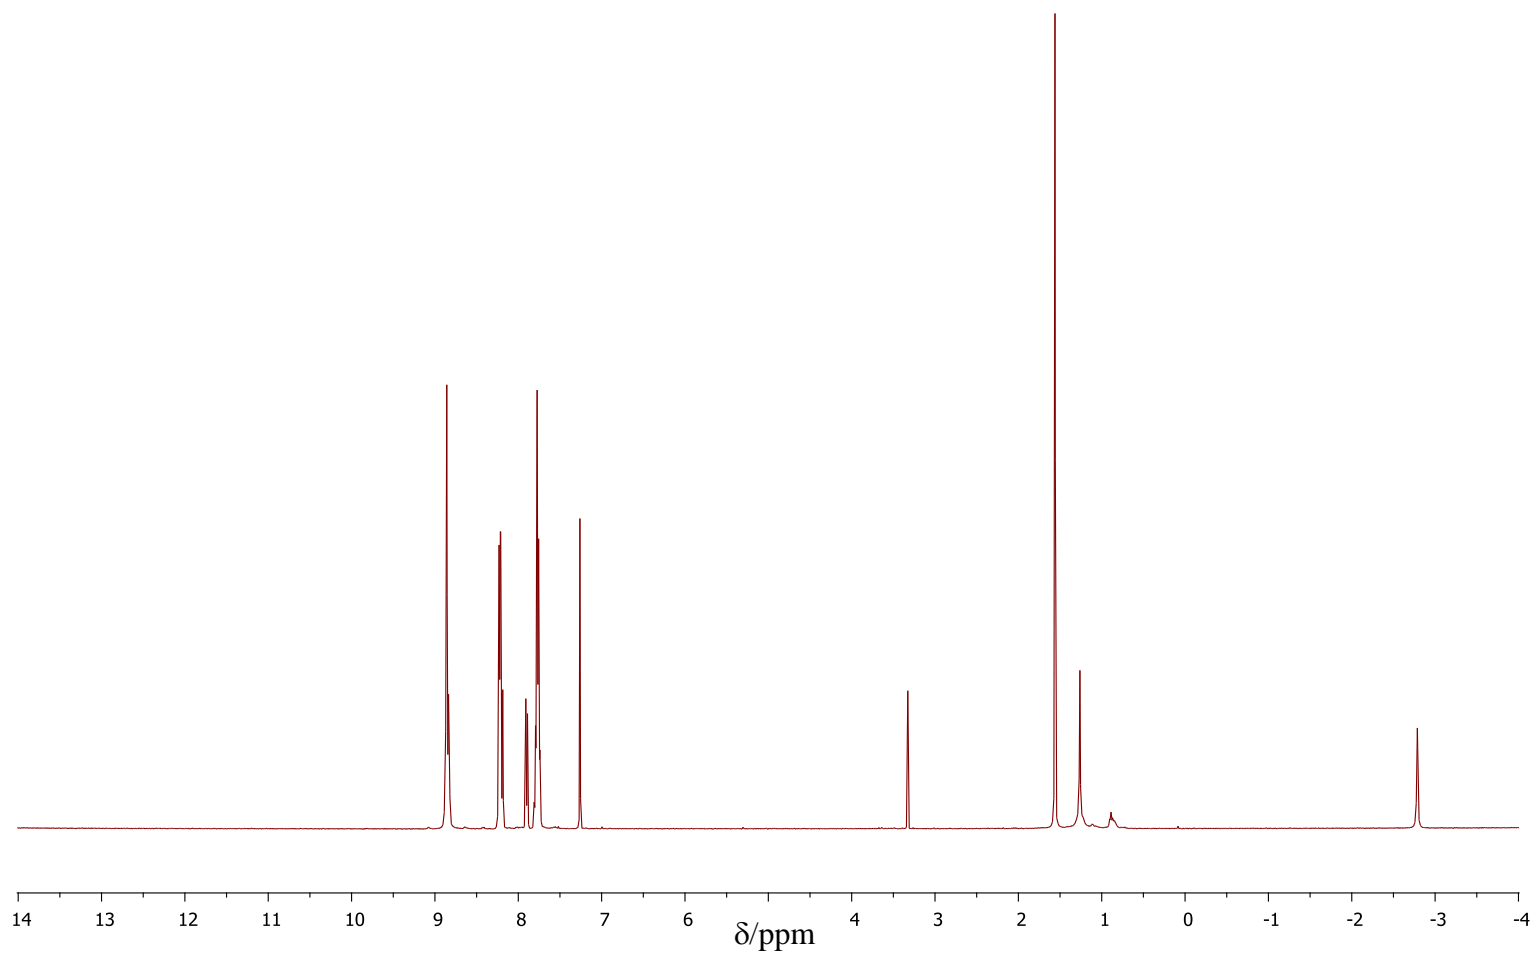

$^1\text{H-NMR}$  spectrum of **2** in  $\text{CDCl}_3$

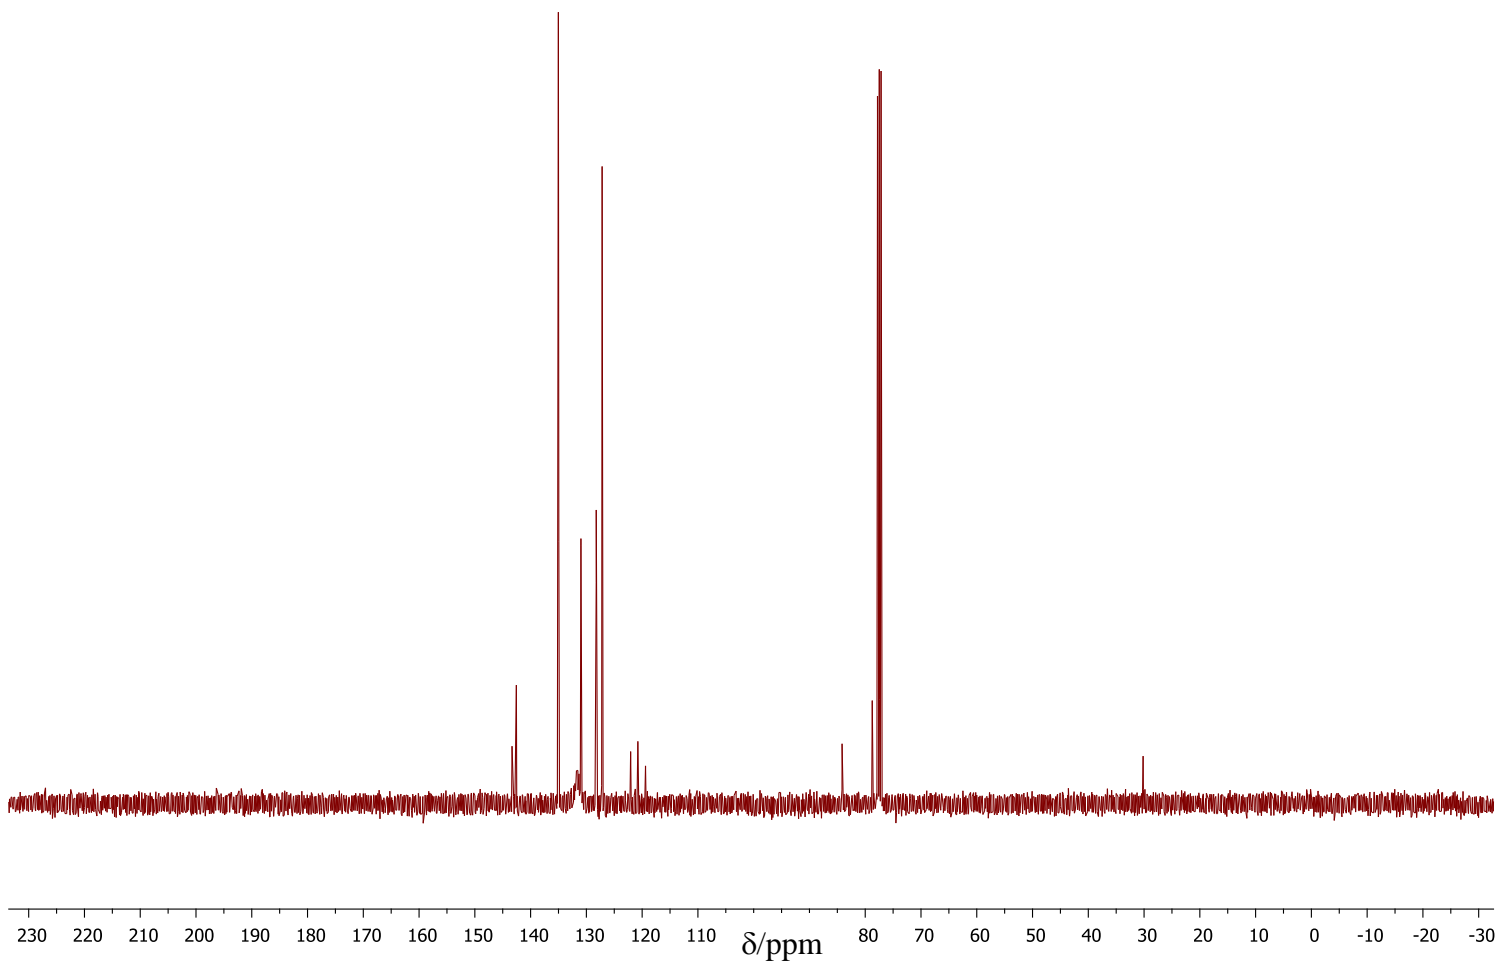

$^{13}\text{C}$ -NMR spectrum of **2** in  $\text{CDCl}_3$

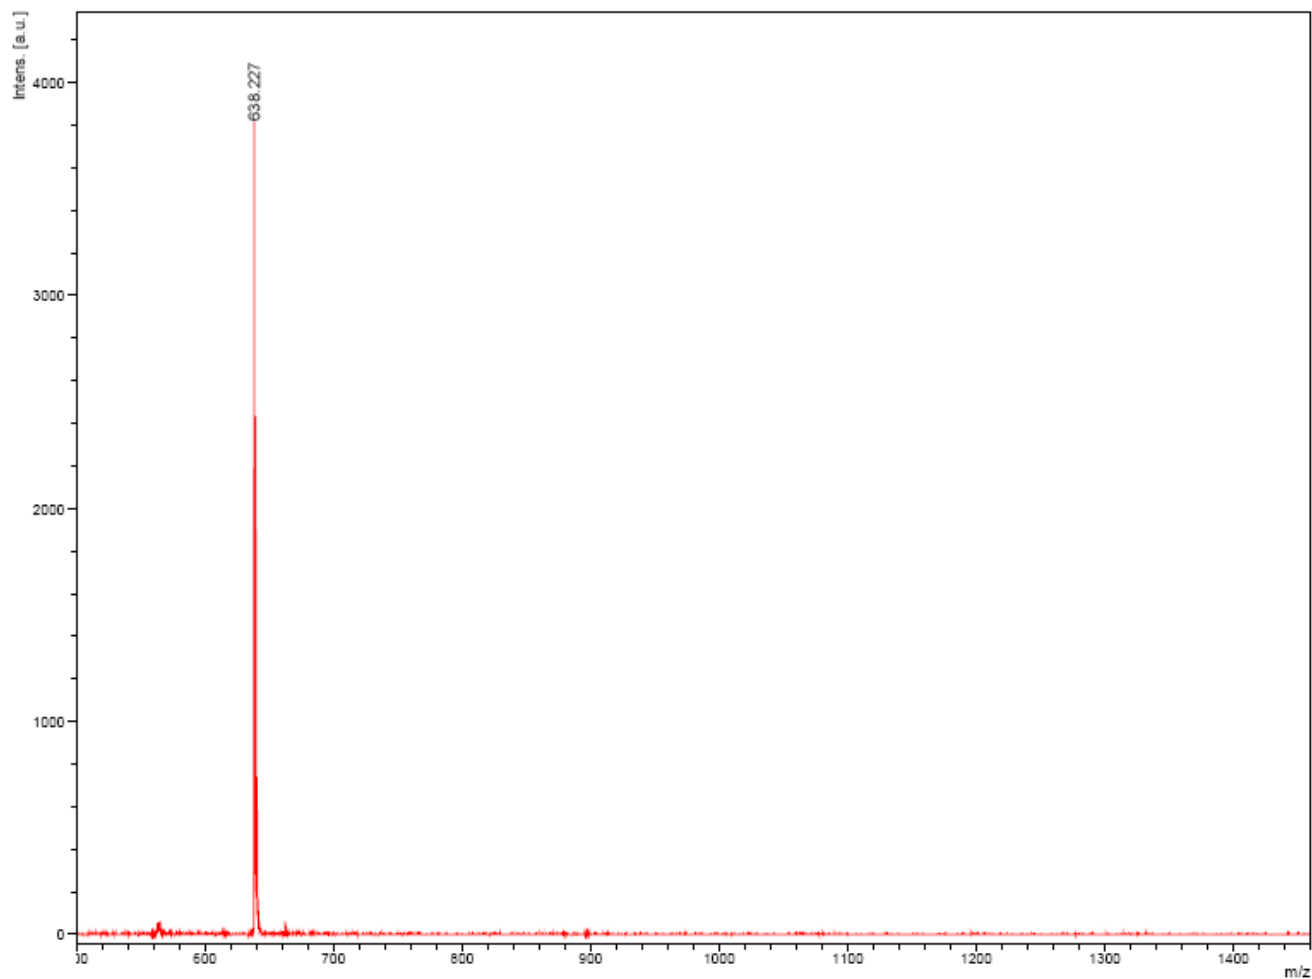

MALDI-TOF-MS spectrum of **2**

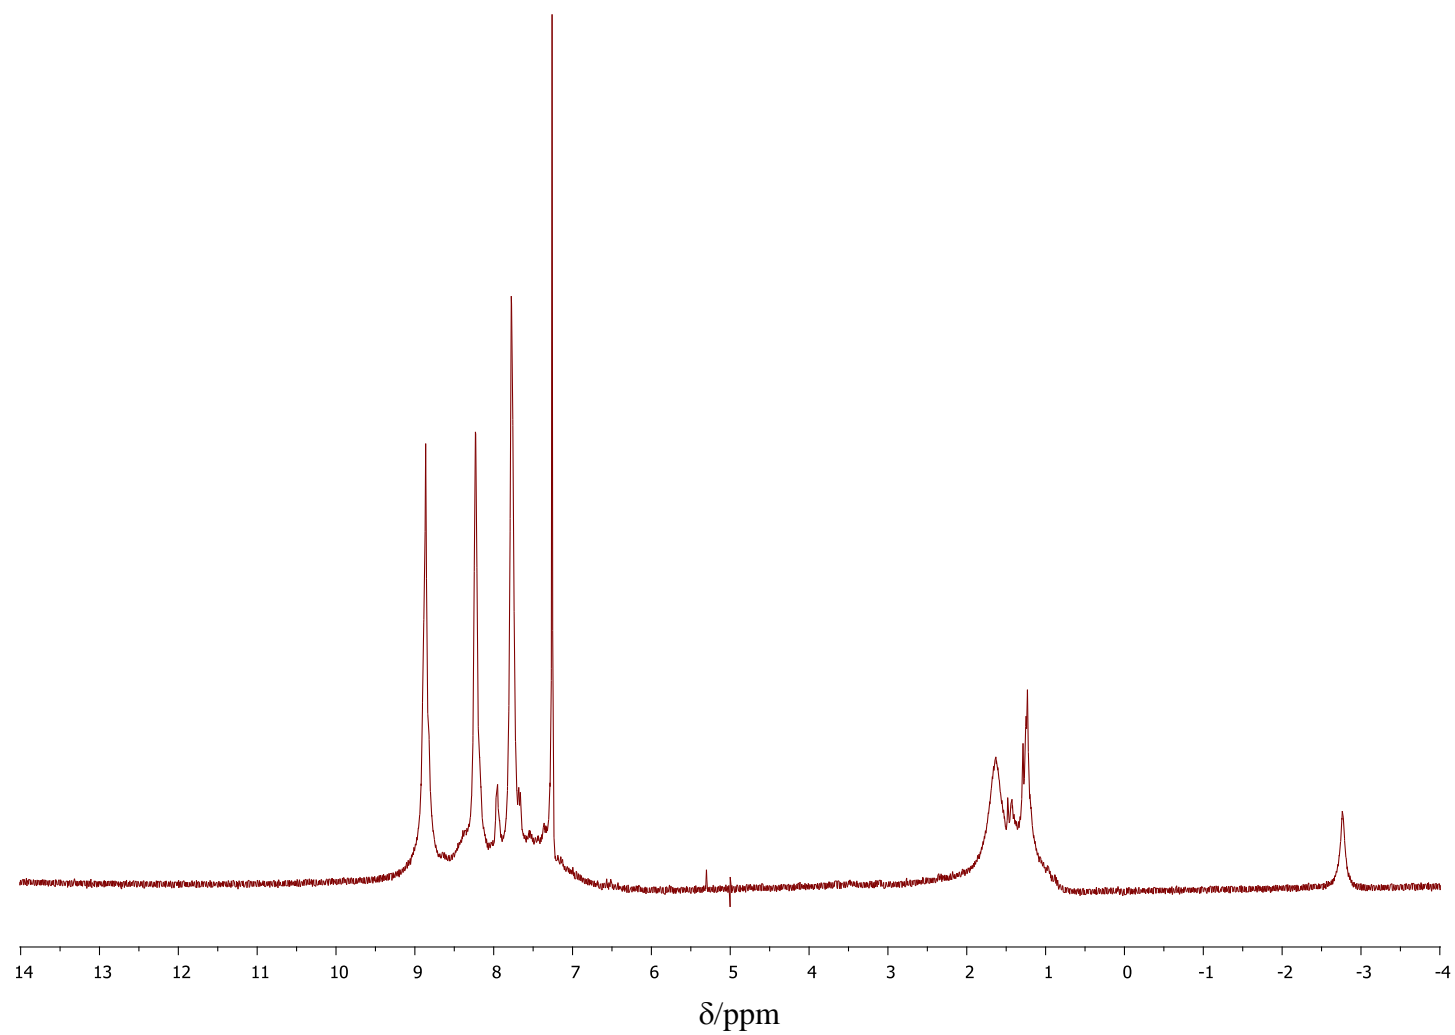

$^1\text{H-NMR}$  spectrum of **4** in  $\text{CDCl}_3$



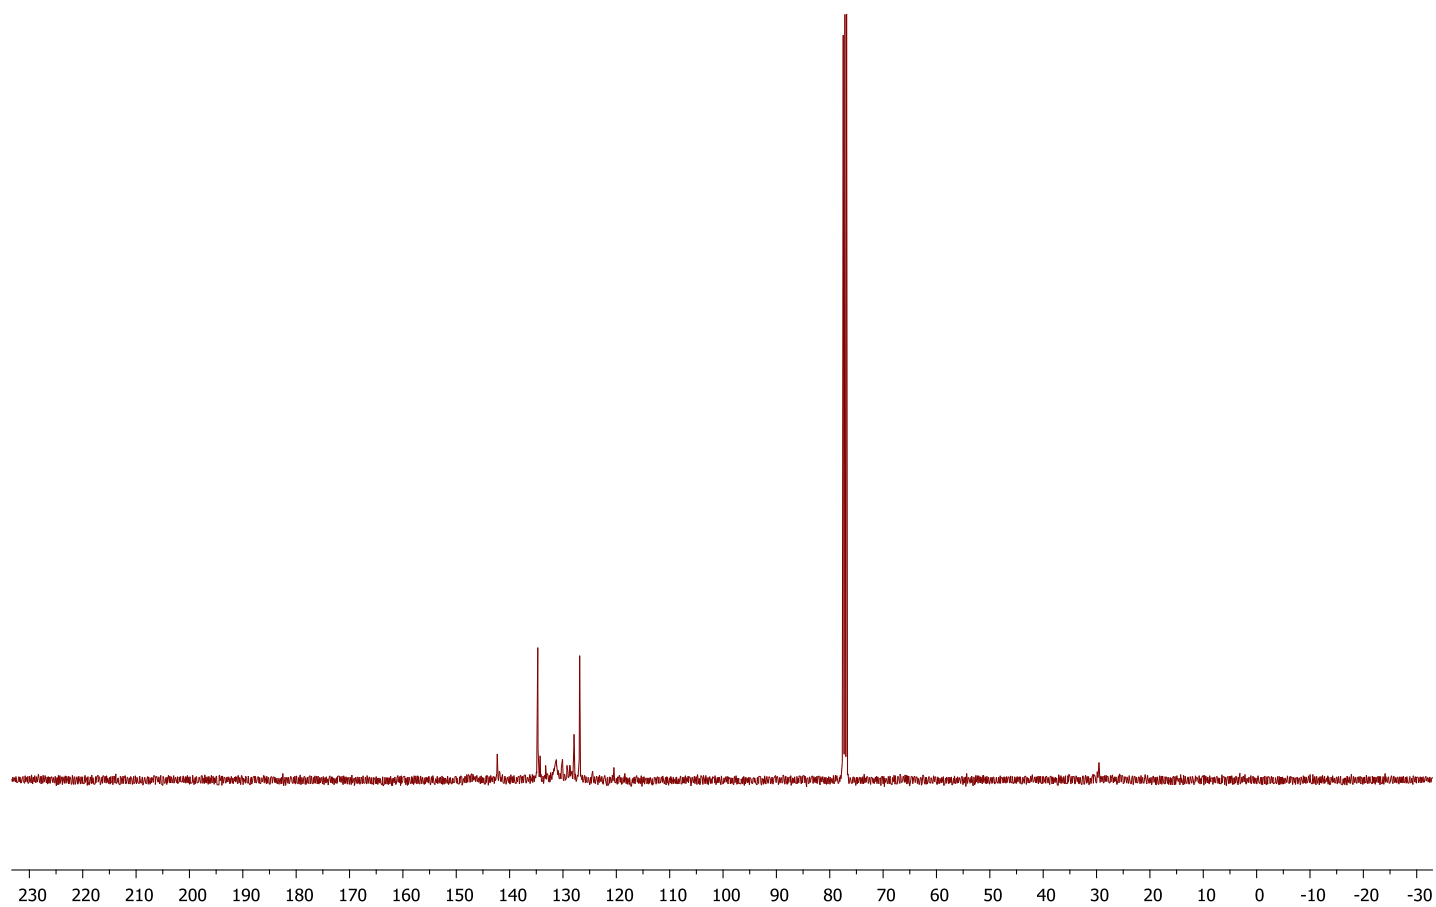

$^{13}\text{C}$ -NMR spectrum of **4** in  $\text{CDCl}_3$

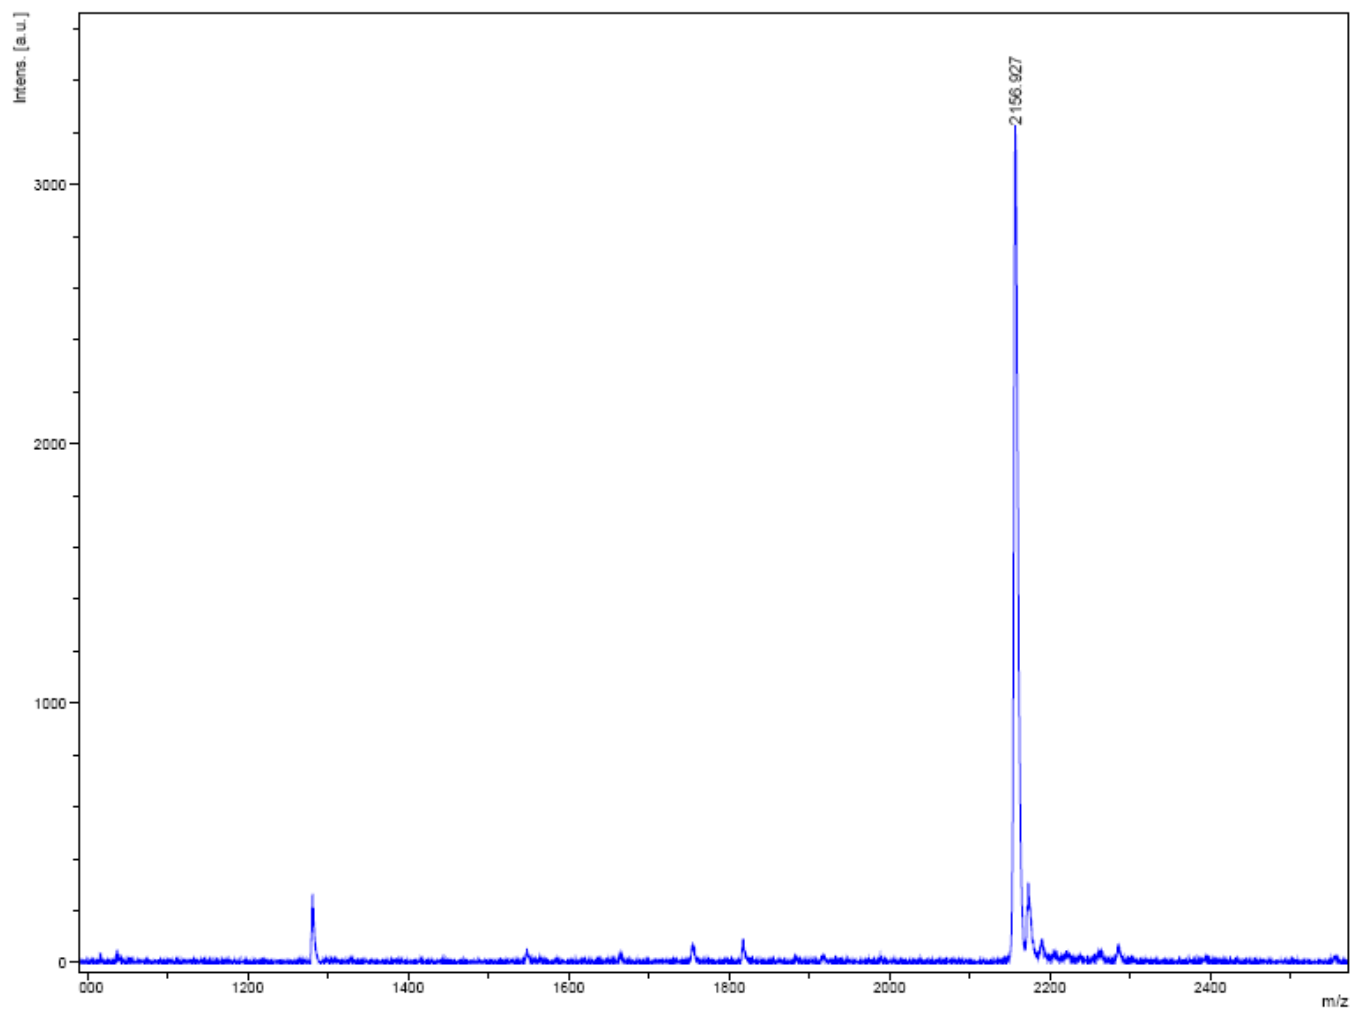

MALDI-TOF-MS spectrum of **4**

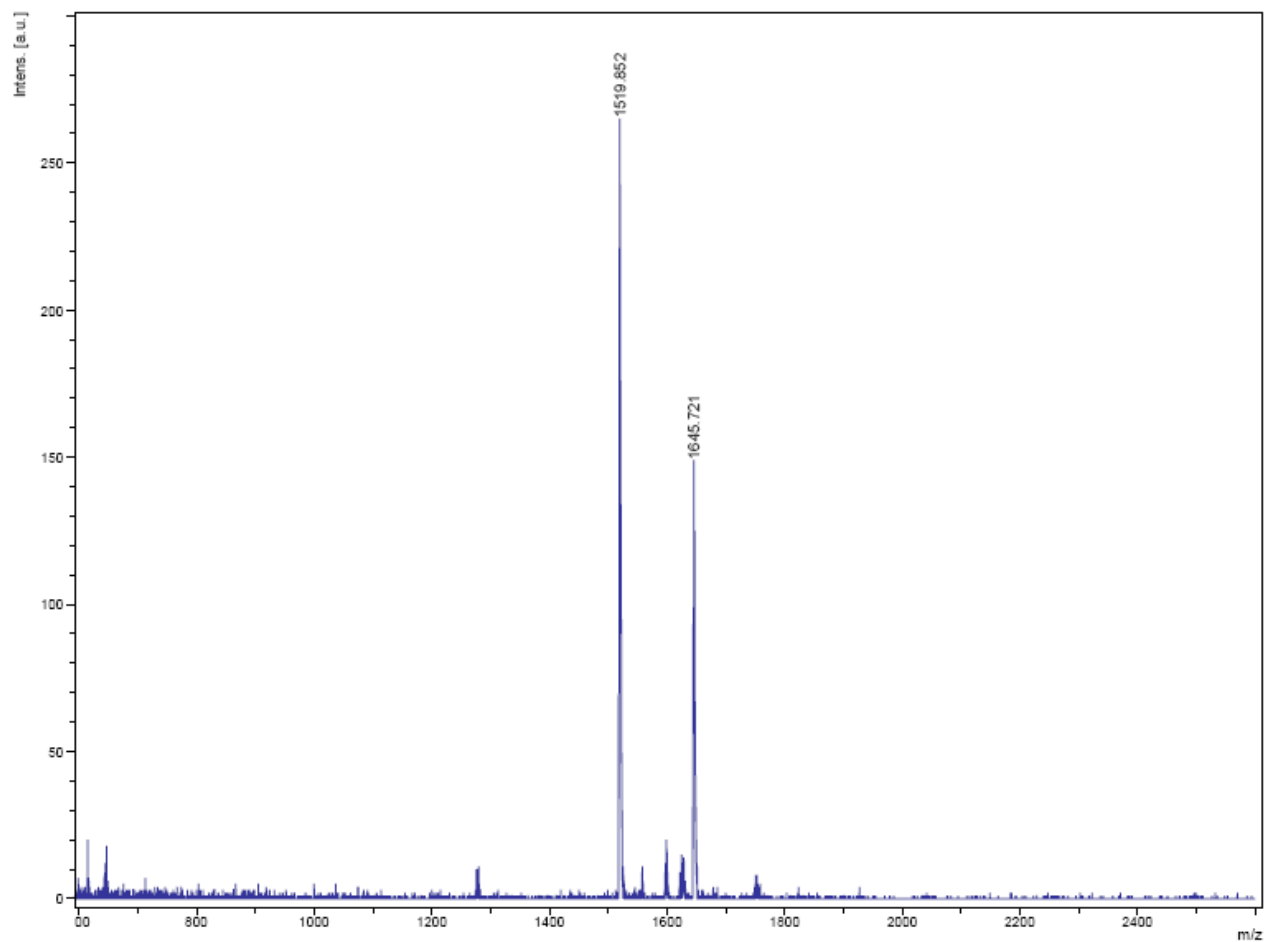

MALDI-TOF-MS spectrum of a mixture containing **5**

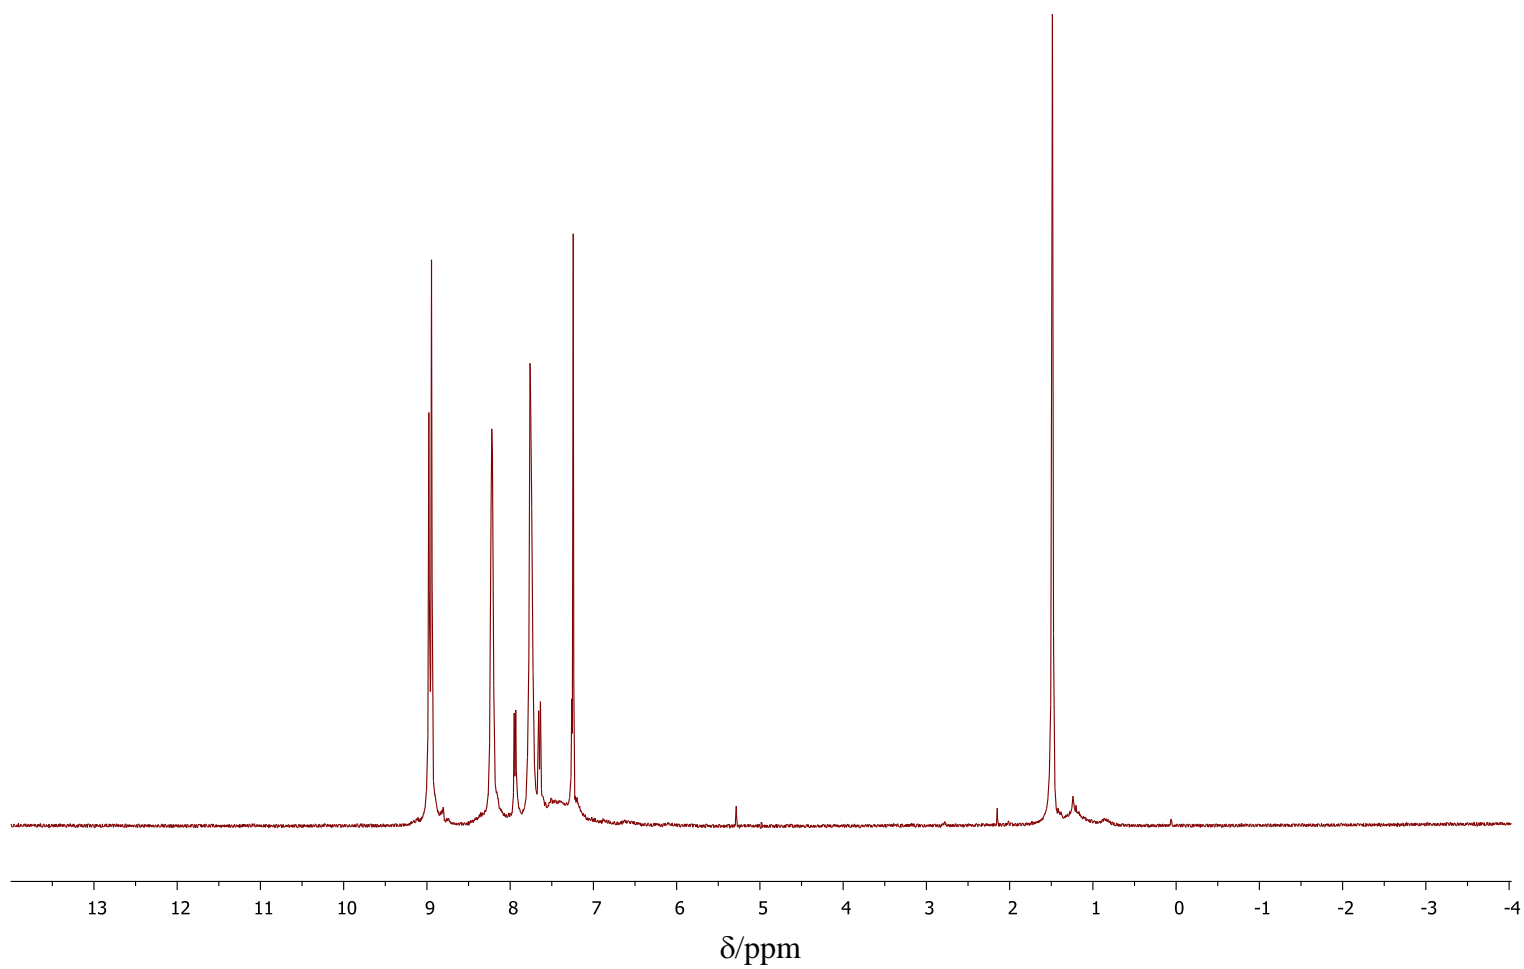

$^1\text{H-NMR}$  spectrum of **Zn-4** in  $\text{CDCl}_3$

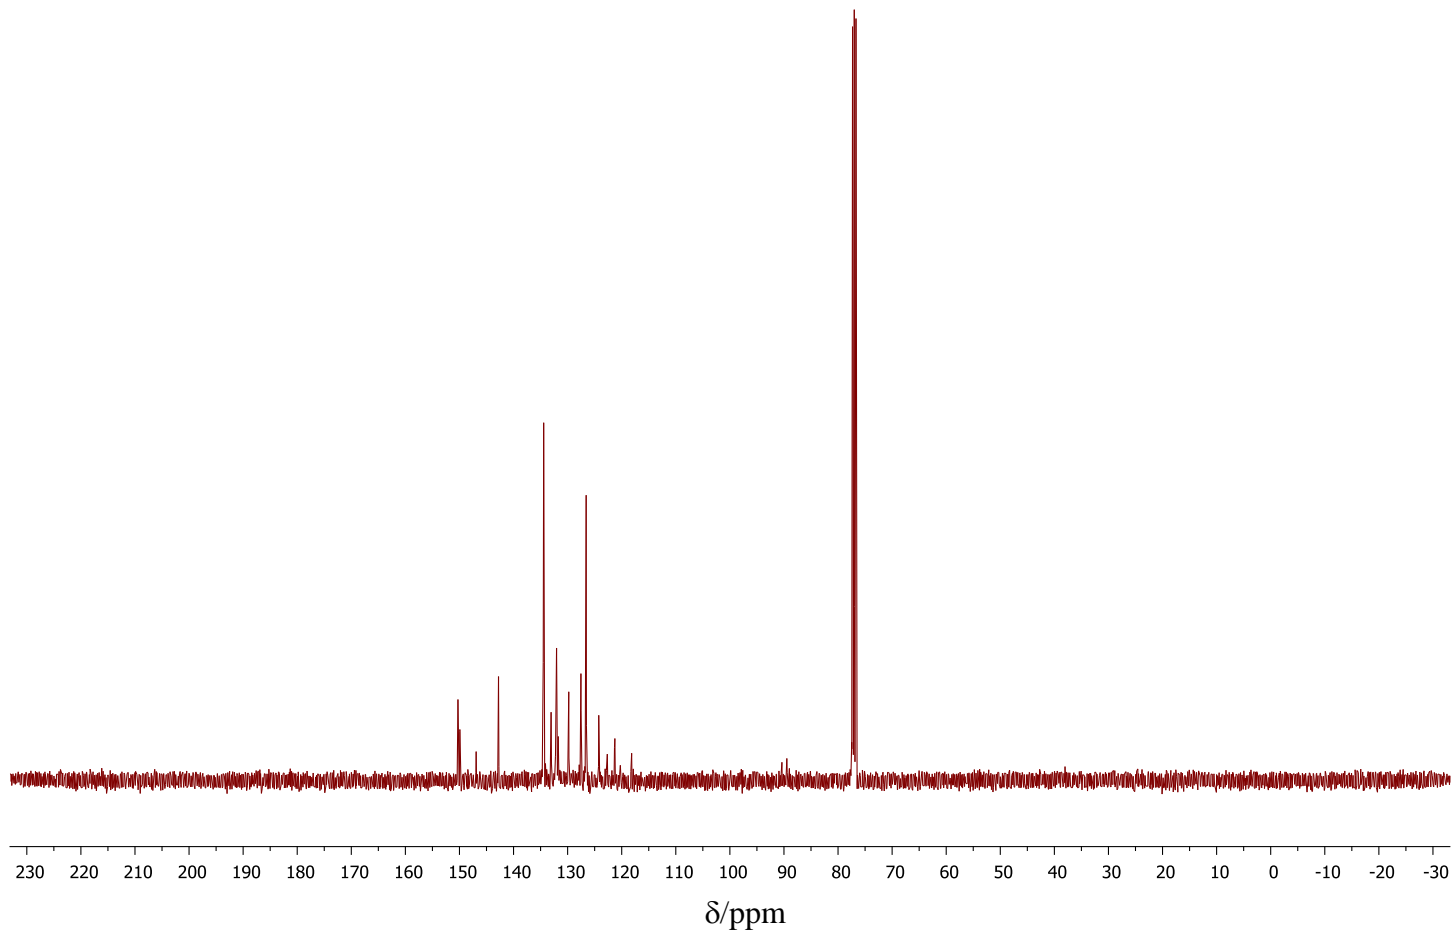

$^{13}\text{C}$ -NMR spectrum of **Zn-4** in  $\text{CDCl}_3$

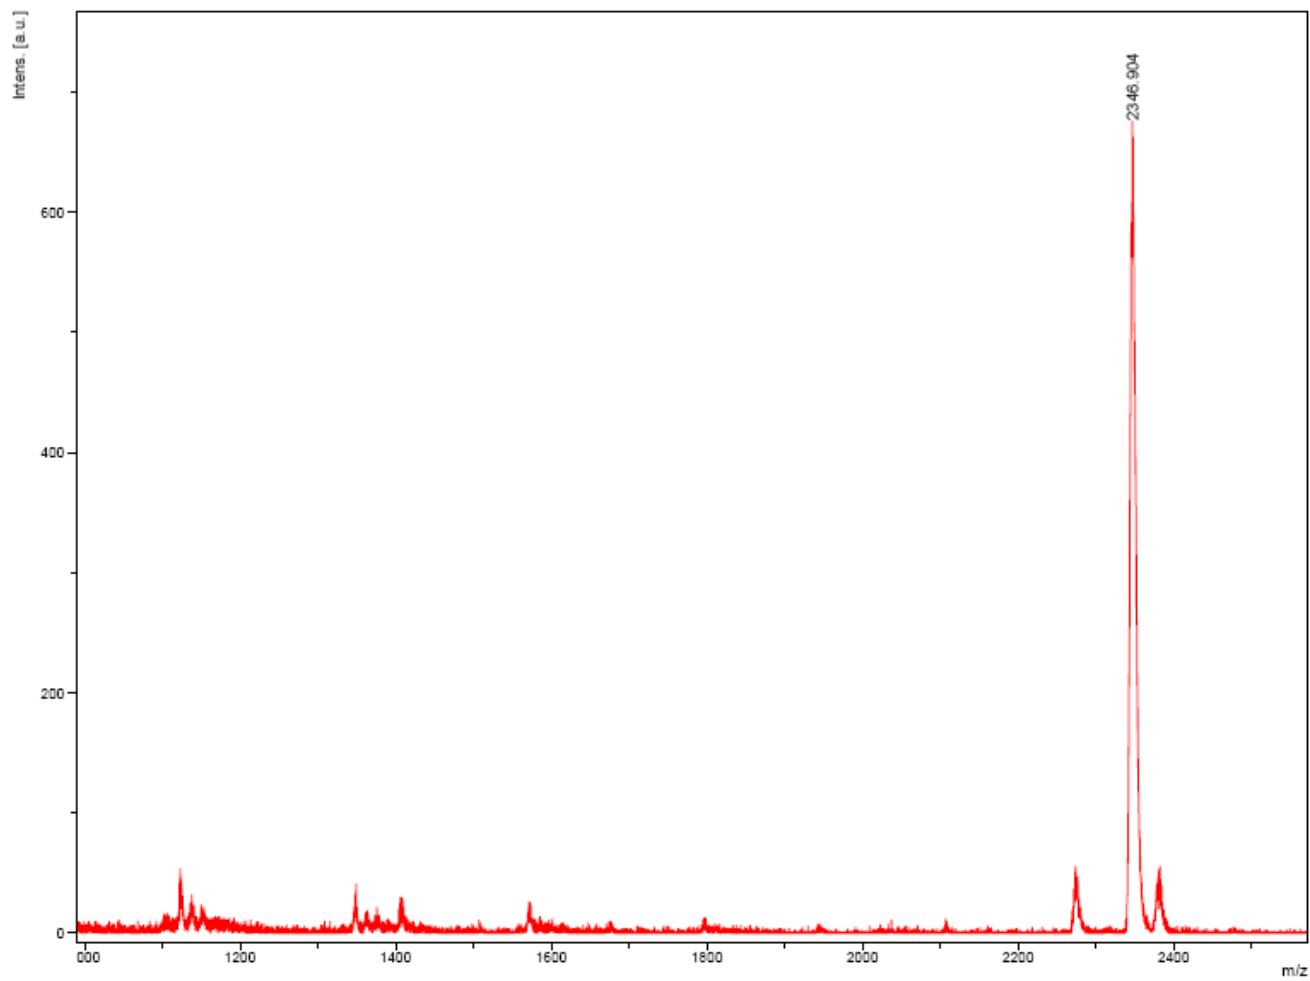

MALDI-TOF-MS spectrum of **Zn-4**

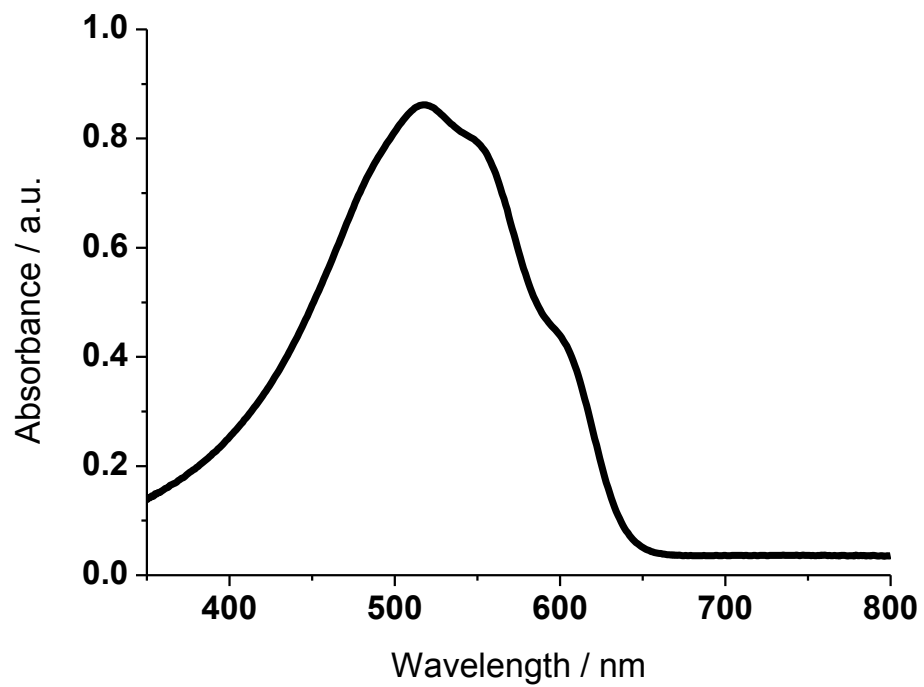

Absorption spectrum of a P3HT film
